# Supplementary material for: Optimization of Printing Parameters for Digital Light Processing 3D Printing of Hollow Microneedle Arrays
Source: MDPI journal article supplement (doi:10.3390/pharmaceutics13111837), 2021-11-02
Supplement: s1 [file s1]

# Supplementary Materials: Optimization of Printing Parameters for Digital Light Processing 3D Printing of Hollow Microneedle Arrays

Essyrose Mathew, Giulia Pitzanti, Ana L. Gomes dos Santos and Dimitrios A. Lamprou

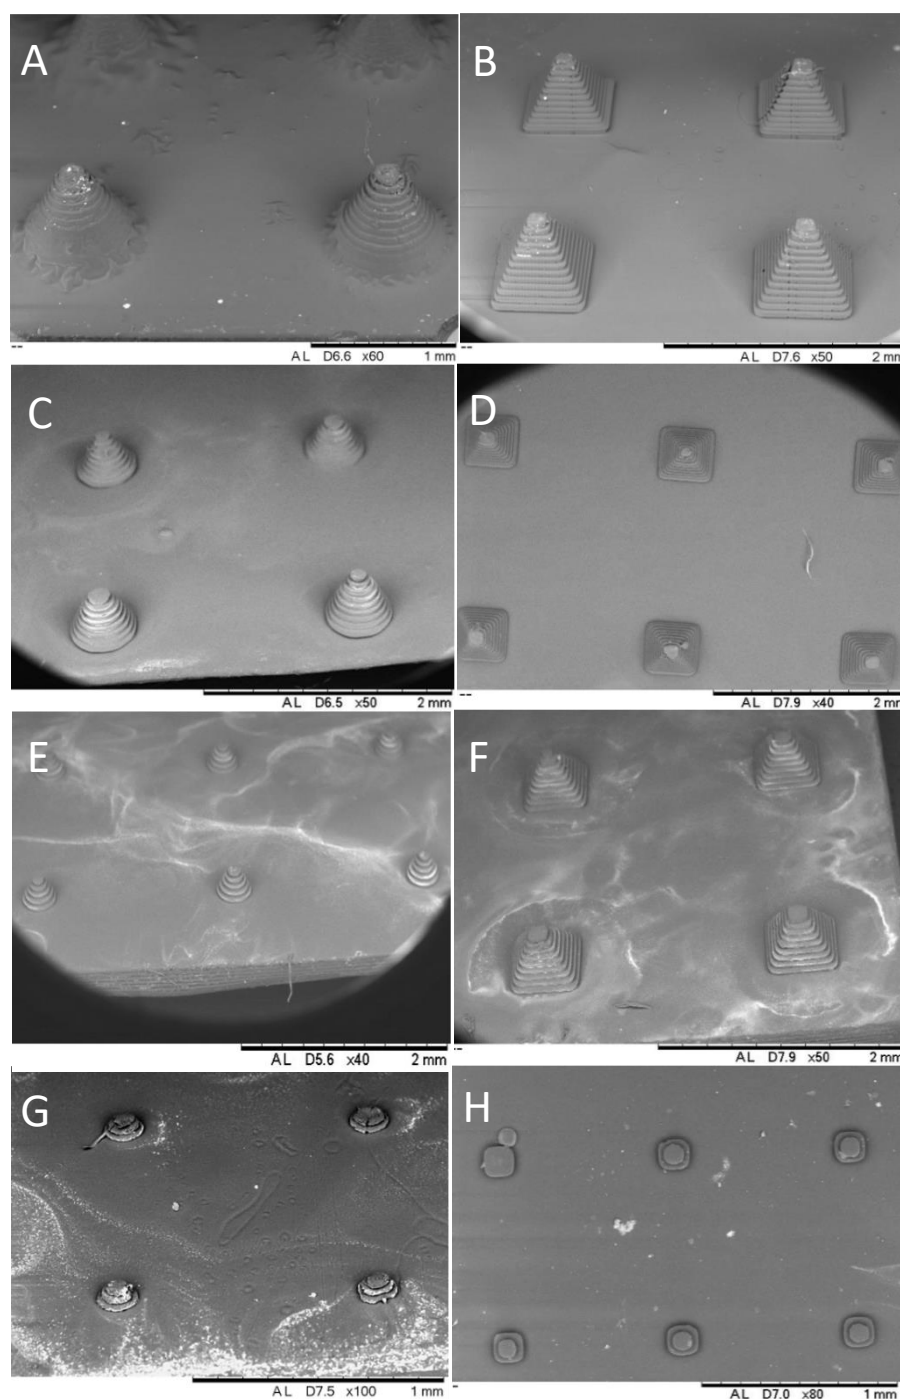

**Figure S1.** Showing Solid MN prints of 800  $\mu\text{m}$  Co (A), Py (B), 600  $\mu\text{m}$  Co (C), Py (D), 400  $\mu\text{m}$  Co (E), Py (F) and 200  $\mu\text{m}$  Co (G), Py (H).

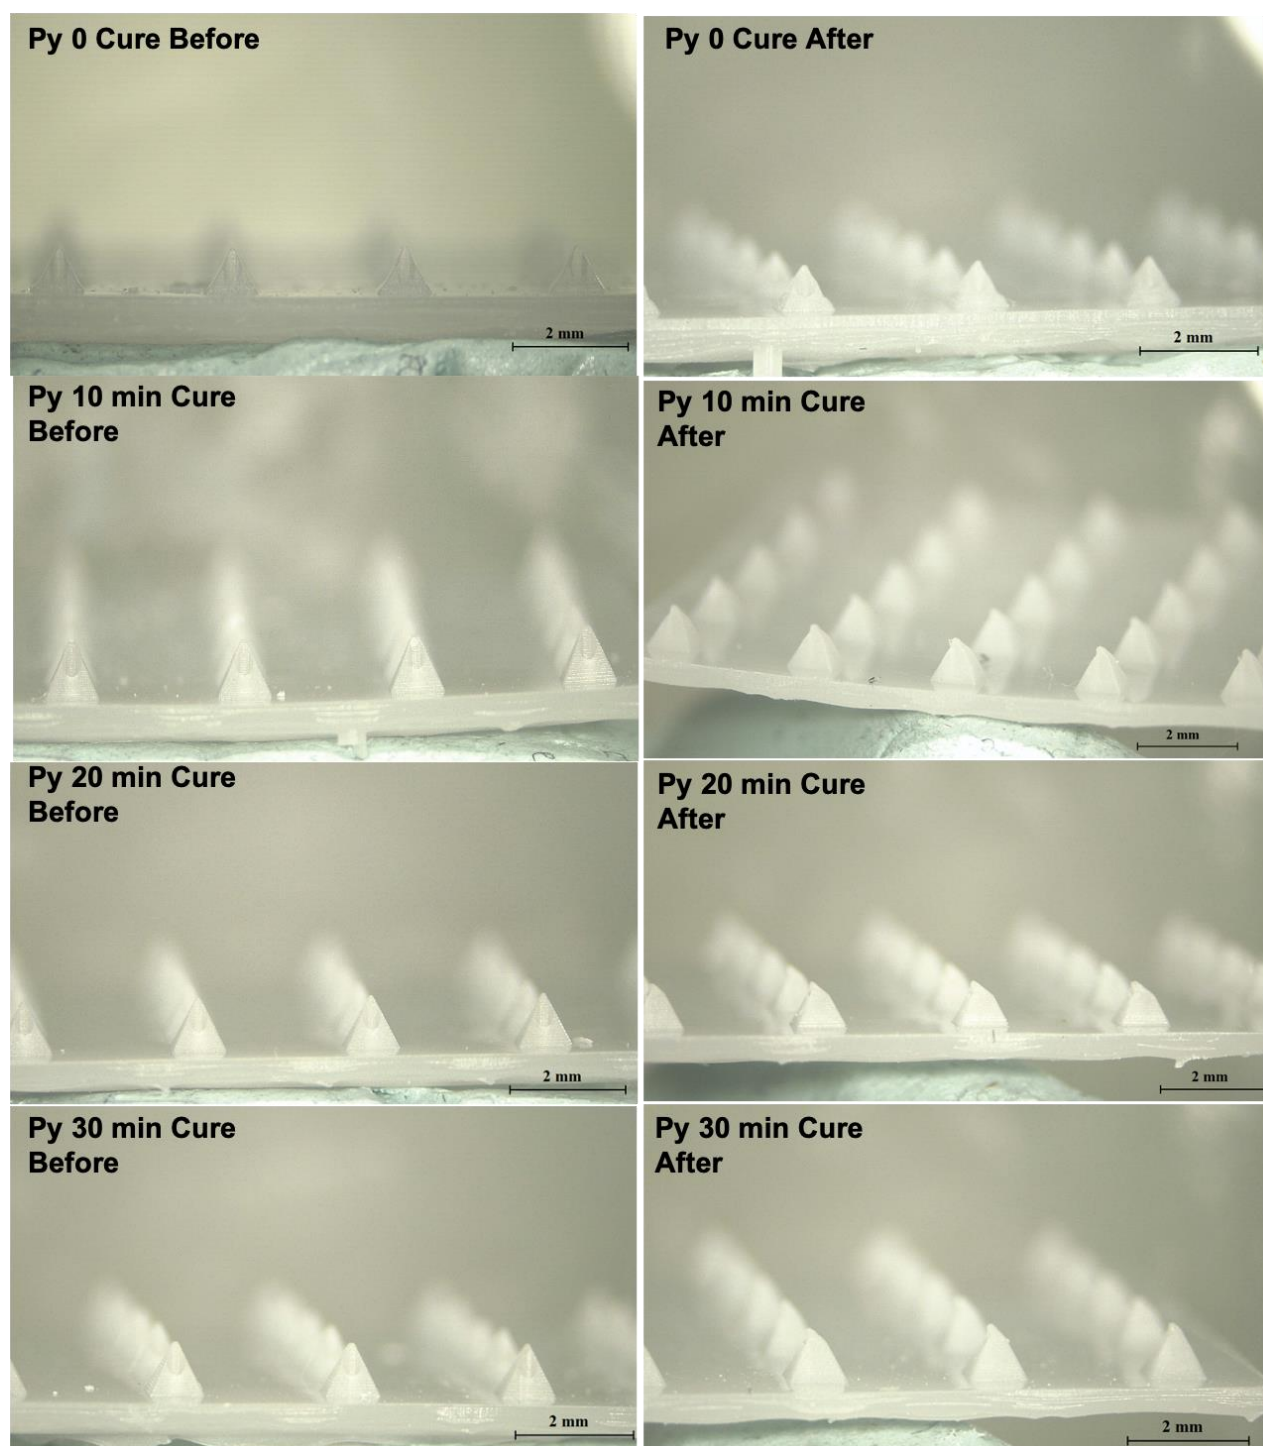

**Figure S2.** Optical Microscopy Images of Pyramidal MN arrays, before and after mechanical testing.

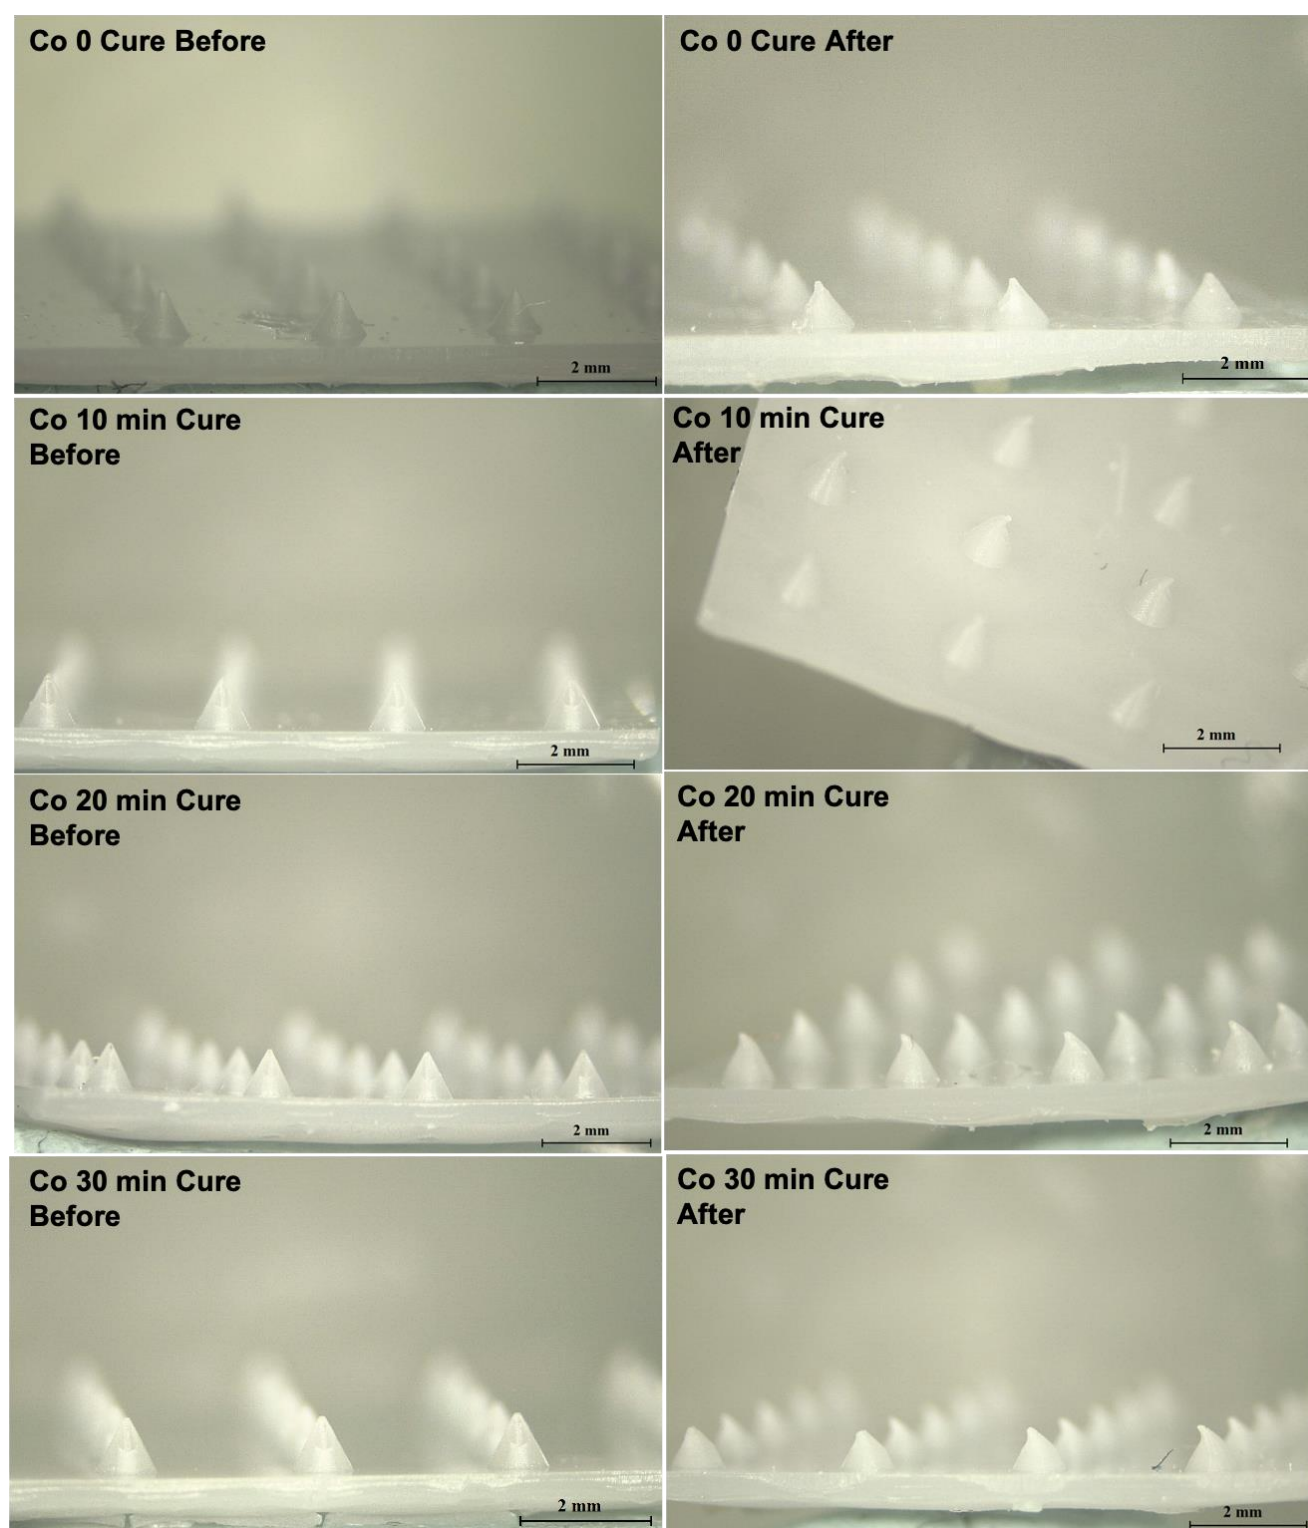

**Figure S3.** Optical Microscopy Images of Conical MN arrays, before and after mechanical testing.
